# Supplementary material for: Long noncoding RNA hotair mediated angiogenesis in nasopharyngeal carcinoma by direct and indirect signaling pathways
Source: PubMed Central journal article supplement (PMC4826237; doi:10.18632/oncotarget.6731), 2015-12-22
Supplement: oncotarget-07-4712-s001.pdf [file oncotarget-07-4712-s001.pdf]

# Long noncoding RNA hotair mediated angiogenesis in nasopharyngeal carcinoma by direct and indirect signaling pathways

## Supplementary Materials

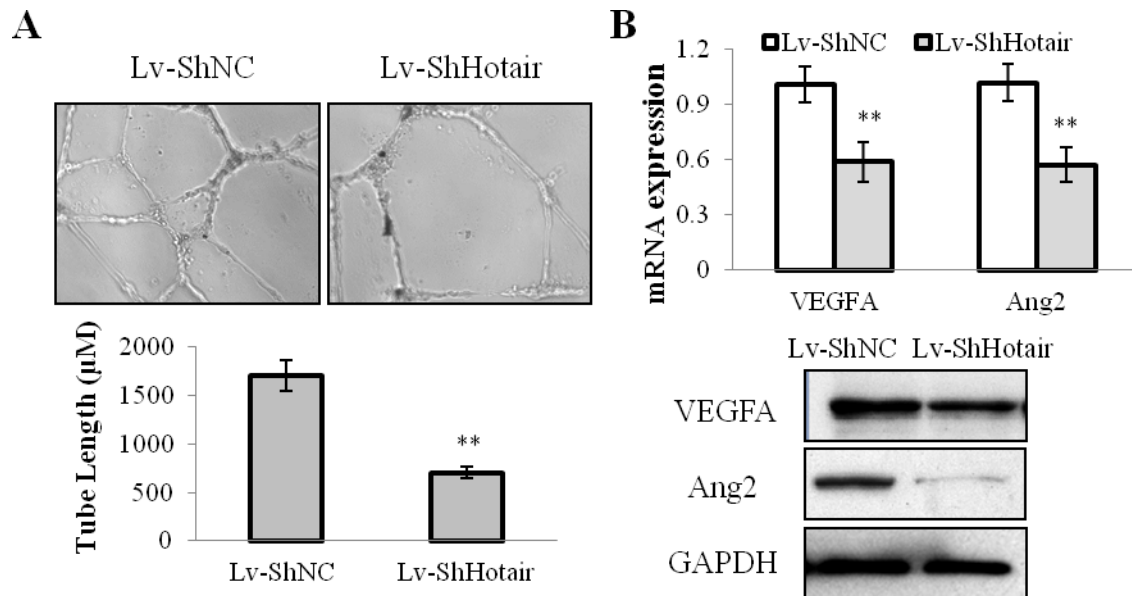

**Supplementary Figure S1: Hotair mediated angiogenesis in CNE2 cells.** (A) the ability of endothelial cell tube formation was suppressed in the Lv-ShHotair-infected condition medium, as compared to the Lv-ShNC infected condition medium. (B) the angiogenic growth factors VEGFA and Ang2 were down-regulated in the Lv-ShHotair infected CNE2 cells at mRNA and protein levels. \* $P < 0.05$ ; \*\* $P < 0.01$ .

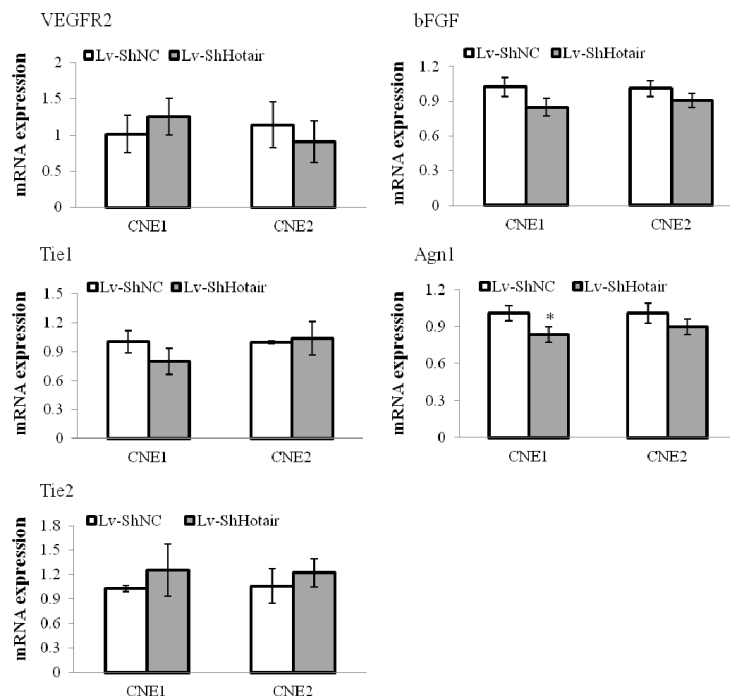

**Supplementary Figure S2: The expression of other angiogenic factors was not significantly affected at mRNA level by Hotair knockdown.**

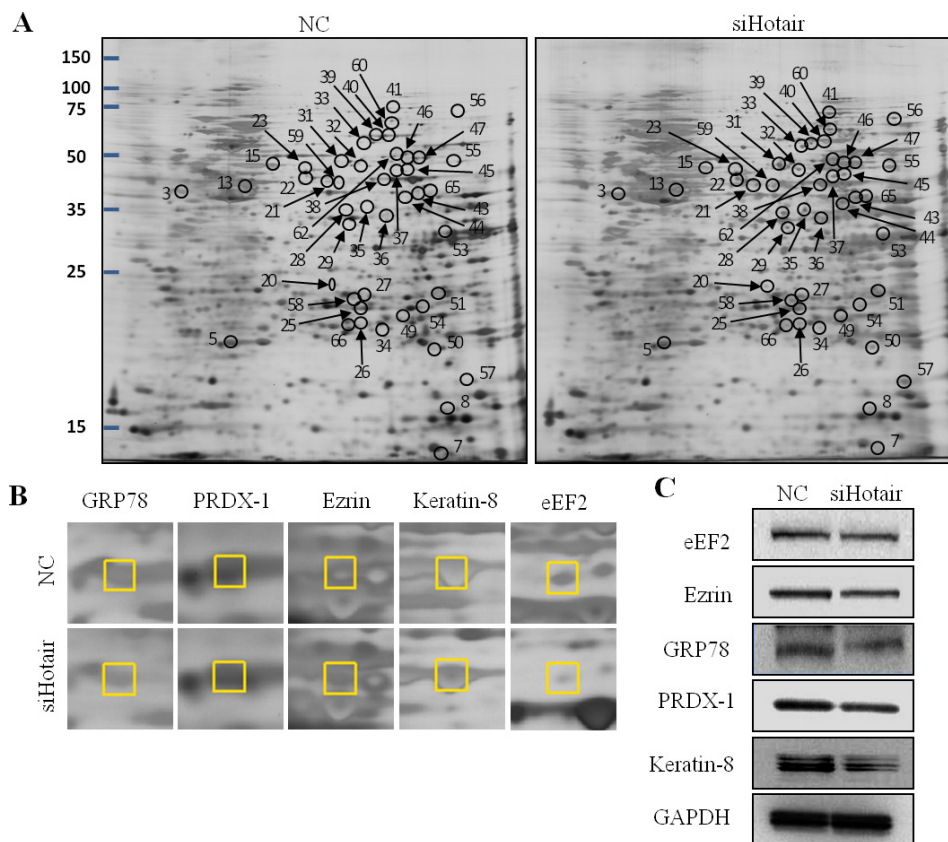

**Supplementary Figure S3: GRP78 was a direct target of Hotair in NPC cells.** (A) the representative silver-stained 2-DE images of CNE1 cells treated with siHotair or NC by using proteomic profiling ( $n = 3$ ). The protein of spot 3 was identified to be human GRP78 by protein database search. (B) enlarged images of differentially expressed protein in the two groups. (C) the five proteins were confirmed by using Western blotting.  $*P < 0.05$ ;  $**P < 0.01$ .

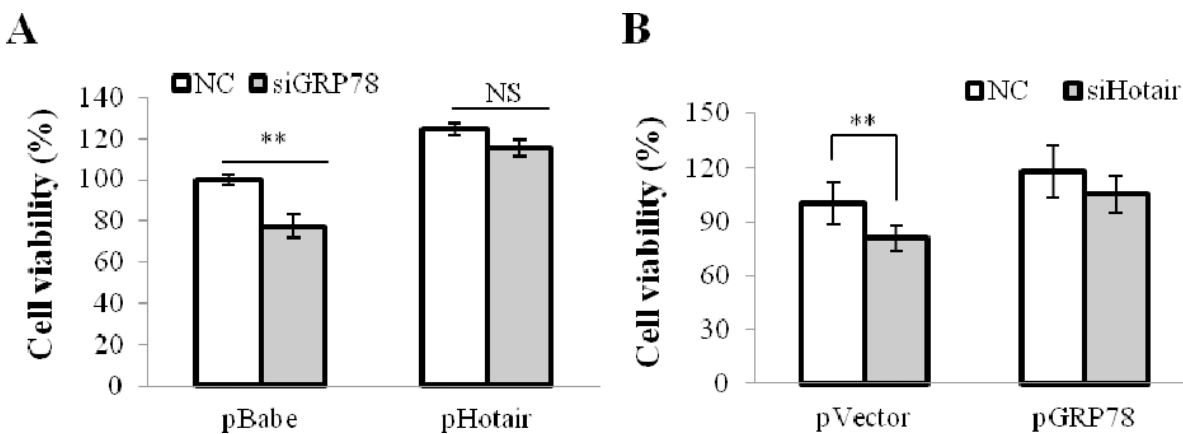

**Supplementary Figure S4: GRP78 mediated cell growth in CNE2 cells.** (A) Hotair overexpression reversed the suppression of cell viability by siGRP78. (B) GRP78 overexpression rescued the siHotair-induced growth inhibition.  $*P < 0.05$ ;  $**P < 0.01$ .

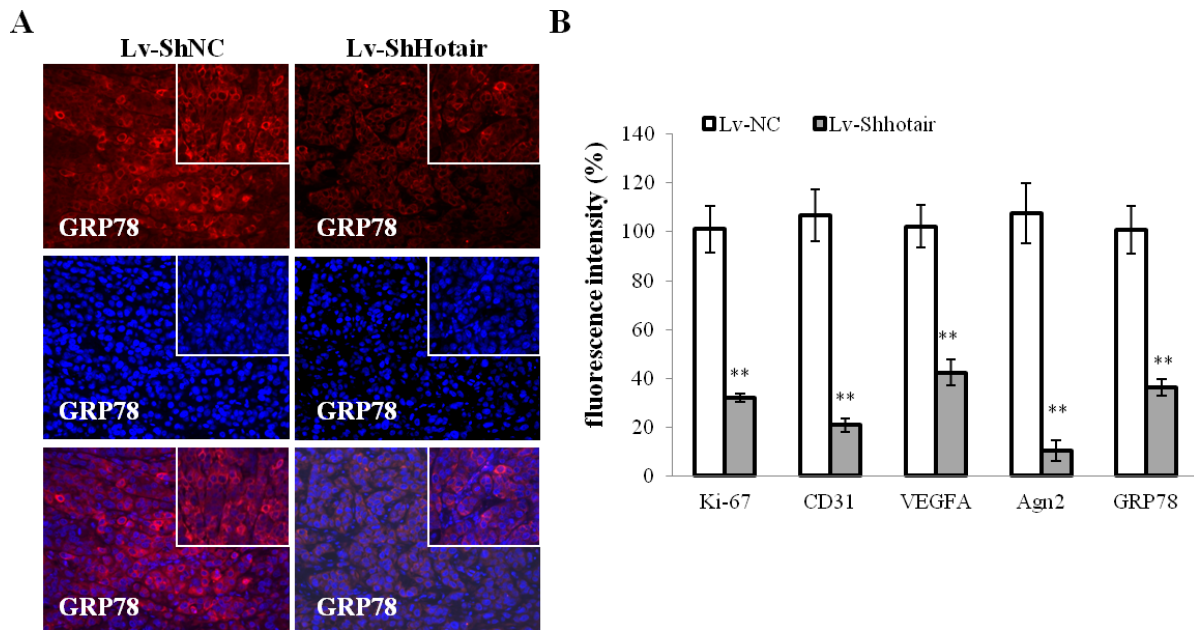

**Supplementary Figure S5: The immunofluorescence double staining analyses.** (A) GRP78 expression was suppressed in Lv-ShHotair treated group. (B) the quantitative analyses for the immunofluorescence staining of Ki-67, CD31, VEGFA, Agn2 and GRP78. \* $P < 0.05$ ; \*\* $P < 0.01$ .

**Supplementary Table S1: Differentially expressed proteins identified by 2-DE and MS analysis between siHotair-treated and NC-treated CNE1 cells**

| Spots No.                                   | Accession No. | Protein name                                             | MW     | PI   | Score | change fold |
|---------------------------------------------|---------------|----------------------------------------------------------|--------|------|-------|-------------|
| Cytoskeleton                                |               |                                                          |        |      |       |             |
| 49                                          | Q12955        | Ankyrin-3 (ANK3)                                         | 482394 | 6.07 | 61    | (+)         |
| 36                                          | P11532        | Dystrophin                                               | 428479 | 5.65 | 58    | 3.4x ↓      |
| 13                                          | P15311        | Ezrin                                                    | 69484  | 5.94 | 66    | 27.2x ↓     |
| 7                                           | P07737        | Profilin-1                                               | 15216  | 8.44 | 122   | (+)         |
| 15                                          | P05787        | Keratin, type II cytoskeletal 8                          | 53671  | 5.52 | 165   | 30x ↓       |
| 62                                          | P13647        | Keratin, type II cytoskeletal 5                          | 62568  | 7.59 | 78    | (-)         |
| 39                                          | P02545        | Lamin-A/C                                                | 74380  | 6.57 | 244   | 3.4x ↓      |
| RNA processing and modification             |               |                                                          |        |      |       |             |
| 58                                          | P31942        | Heterogeneous nuclear ribonucleoprotein H3               | 36960  | 6.37 | 151   | (-)         |
| 65                                          | Q14103        | Heterogeneous nuclear ribonucleoprotein D0               | 38581  | 7.62 | 127   | (-)         |
| 53                                          | P22626        | Heterogeneous nuclear ribonucleoproteins A2/B1           | 37464  | 8.97 | 70    | 4.2x ↑      |
| Regulation of transcription and translation |               |                                                          |        |      |       |             |
| 45                                          | P13639        | Elongation factor 2                                      | 96246  | 6.41 | 70    | 4.3x ↓      |
| 41                                          | Q92945        | Far upstream element-binding protein 2                   | 73443  | 6.84 | 123   | 3.9x ↓      |
| 60                                          | Q96AE4        | Far upstream element-binding protein 1                   | 67690  | 7.18 | 103   | (-)         |
| 35                                          | Q15365        | Poly(rC)-binding protein 1                               | 37987  | 6.66 | 62    | 3.2x ↓      |
| 32                                          | Q9Y265        | RuvB-like 1                                              | 50538  | 6.02 | 80    | 4.5x ↓      |
| Post-translational modification             |               |                                                          |        |      |       |             |
| 29                                          | A2A3K4        | Protein tyrosine phosphatase domain-containing protein 1 | 85543  | 7.35 | 109   | 3.3x ↓      |
| 21                                          | O75439        | Mitochondrial-processing peptidase subunit beta          | 55073  | 6.38 | 88    | 3.5x ↓      |

| Chaperones and stress response   |        |                                                              |       |      |     |         |
|----------------------------------|--------|--------------------------------------------------------------|-------|------|-----|---------|
| 3                                | P11021 | 78 kDa glucose-regulated protein                             | 72402 | 5.07 | 109 | 18.6x ↓ |
| 51                               | P11142 | Heat shock cognate 71 kDa protein                            | 71082 | 5.37 | 358 | 3.0x ↑  |
| 5                                | Q06830 | Peroxiredoxin-1                                              | 22324 | 8.27 | 61  | 7.6x ↓  |
| 25                               | P30041 | Peroxiredoxin-6                                              | 25133 | 6    | 67  | 3.4x ↑  |
| 66                               | P61758 | Prefoldin subunit 3                                          | 22815 | 6.63 | 60  | (+)     |
| 33                               | P40227 | T-complex protein 1 subunit zeta                             | 58444 | 6.23 | 105 | 5.7x ↓  |
| 31                               | P78371 | T-complex protein 1 subunit beta                             | 57794 | 6.01 | 157 | 3.8x ↓  |
| Chaperone regulators             |        |                                                              |       |      |     |         |
| 26                               | O95816 | BAG family molecular chaperone regulator 2                   | 23928 | 6.25 | 68  | 3.2x ↑  |
| Metabolic enzymes and regulators |        |                                                              |       |      |     |         |
| 38                               | P06733 | Alpha-enolase (ENO1)                                         | 47481 | 7.01 | 78  | 6.0x ↓  |
| 55                               | P25705 | ATP synthase subunit alpha, mitochondrial                    | 59828 | 9.16 | 358 | 3.4x ↑  |
| 43                               | P22695 | Cytochrome b-c1 complex subunit 2, mitochondrial             | 48584 | 8.74 | 56  | 3.9x ↓  |
| 52                               | P04406 | Glyceraldehyde-3-phosphate dehydrogenase (GAPDH)             | 36201 | 8.57 | 122 | 6.0x ↑  |
| 57                               | P51970 | NADH dehydrogenase [ubiquinone] 1 alpha subcomplex subunit 8 | 20548 | 7.57 | 34  | 3.9x ↓  |
| 8                                | P22392 | Nucleoside diphosphate kinase B                              | 17401 | 8.52 | 83  | (+)     |
| 44                               | P00558 | Phosphoglycerate kinase 1                                    | 44985 | 8.3  | 74  | 4.2x ↓  |
| 27                               | P18669 | Phosphoglycerate mutase 1                                    | 28900 | 6.67 | 106 | 4.7x ↓  |
| 22                               | P14618 | Pyruvate kinase isozymes M1/M2                               | 58470 | 7.96 | 220 | 21.5x ↓ |
| 46                               | Q9NR45 | Sialic acid synthase                                         | 40738 | 6.29 | 55  | 5.2x ↑  |
| 54                               | P60174 | Triosephosphate isomerase                                    | 26938 | 6.45 | 82  | (+)     |
| 41                               | P53007 | Tricarboxylate transport protein, mitochondrial              | 34333 | 9.91 | 63  | 3.9x ↓  |

| Growth regulation                 |        |                                                              |        |      |     |        |
|-----------------------------------|--------|--------------------------------------------------------------|--------|------|-----|--------|
| 56                                | O60566 | Mitotic checkpoint serine/threonine-protein kinase BUB1 beta | 120781 | 5.2  | 69  | 4.2x ↓ |
| 59                                | Q9UQ80 | Proliferation-associated protein 2G4                         | 44101  | 6.13 | 50  | (-)    |
| 40                                | Q9BXU1 | Serine/threonine-protein kinase 31                           | 116647 | 5.04 | 56  | 47x ↓  |
| Miscellaneous functional proteins |        |                                                              |        |      |     |        |
| 52                                | P07355 | Annexin A2                                                   | 38808  | 7.57 | 72  | 6.0x ↑ |
| 50                                | P30086 | Phosphatidylethanolamine-binding protein 1                   | 21158  | 7.01 | 178 | 3.6x ↑ |
| 23                                | Q9H0H3 | Ectoderm-neural cortex protein 2                             | 66964  | 6.1  | 60  | 3.7x ↓ |

With a 2-fold difference cutoff in intensity, 52 spots were selected for further MALDI-TOF-MS/MS-MS analysis, and 43 proteins were finally identified. CI, confidence interval

### Supplementary Table S2: Primers for the qPCR analysis

| Gene   | Primer sequence (5'-3')                |
|--------|----------------------------------------|
| GAPDH  | <i>Forward:</i> TATTCAGGAAGGTGTTACTTAA |
|        | <i>Reverse:</i> TAAGGCACCCTTCTGAGTAGA  |
| Hotair | <i>Forward:</i> CAGTGGGGAAGTCTGACTCG   |
|        | <i>Reverse:</i> GTGCCTGGTGCTCTCTTACC   |
| VEGFA  | <i>Forward:</i> CTACCTCCACCATGCCAAGT   |
|        | <i>Reverse:</i> GCGCTGCGCTGATAGAAGTA   |
| Ang2   | <i>Forward:</i> CTGGGAAGGGAATGAGGCTT   |
|        | <i>Reverse:</i> CATGCATCAAACCACCAGCC   |
| VEGFR2 | <i>Forward:</i> TGATGTGGTCTGAGTCCGT    |
|        | <i>Reverse:</i> AGACTGGGTTTTAGGTCTCGG  |
| Tie-1  | <i>Forward:</i> TGGCTGCTCTTGTGGATCTG   |
|        | <i>Reverse:</i> TCTCACAGTGCACTCCATGC   |
| Tie-2  | <i>Forward:</i> TTCACCAGGCTGATAGTCCG   |
|        | <i>Reverse:</i> ACACGTCCTTCCCATAAACCC  |
